# Supplementary material for: Sulfur isotope analysis by MC-ICP-MS and application to small medical samples
Source: Royal Society of Chemistry journal article supplement (doi:10.1039/c5ja00489f), 2016-01-01
Supplement: c5ja00489f1.xlsx [file c5ja00489f1.xlsx]

## Sheet: Matrix effect
Matrix effect
sample	k=wt% S4/tot S	δ33S/32SAA*	2s**	δ34S/32SAA*	2𝜎	δ33S/34SAA*	2𝜎	δ34S/32SVCDT	2𝜎	N***	2𝜎/√N	S/P
AA* std after chemistry	0	-0.0449993	0.15	0.0631849	0.1	-0.175359	0.15	4.95318	0.1	1	0.1
blank		-0.84	0.1							1
222H	0	0.822021	0.103816	1.45505	0.141399	-0.634457	0.162695	6.34505	0.141399	8	0.0499922
222H+IAEA S4	0.2	1.77246	0.167578	3.31836	0.0472622	-1.51559	0.117452	8.20836	0.0472622	2	0.0334195
222H+IAEA S4	0.33	2.47165	0.0234107	4.59135	0.0186549	-2.11464	0.0392543	9.48135	0.0186549	2	0.013191
222H+IAEA S4	0.5	3.20749	0.128545	6.15261	0.0593928	-2.94847	0.133032	11.0426	0.0593928	2	0.0419971
IAEA S4 no chemistry	1	5.89343	0.190926	11.3836	0.0813119	-5.43344	0.086384	16.2736	0.0813119	4	0.0406559
AA*+P (S/P=1)	0	-0.508967	0.152827	-1.29733	0.237636	0.802027	0.134906	3.59267	0.237636	2	0.168034
AA*+P (S/P=1)+IAEA S4	0.2	0.522668	0.0520945	0.891896	0.398356	-0.342524	0.445199	5.7819	0.398356	2	0.28168
AA*+P (S/P=1)+IAEA S4	0.33	1.08607	0.0488008	1.97923	0.0578041	-0.885373	0.0784668	6.86923	0.0578041	2	0.0408737
AA*+P (S/P=1)+IAEA S4	0.5	1.68948	0.0932158	3.2636	0.0275933	-1.59914	0.0208309	8.1536	0.0275933	2	0.0195114	20
AA* + phosphate S/P=20		-0.105783	0.133494	-0.0577003	0.131393	-0.0437598	0.117598	4.8323	0.117598	5	0.0525914	10
AA* + phosphate S/P=10		-0.0824618	0.250303	-0.160297	0.112495	0.0922151	0.0995772	4.7297	0.0995772	5	0.0445323	5
AA* + phosphate S/P=5		-0.0887569	0.0468377	-0.278257	0.0132382	0.180713	0.148359	4.61174	0.148359	5	0.066348	2
AA* + phosphate S/P=2		-0.243039	0.150977	-0.636854	0.0878221	0.383355	0.163236	4.25315	0.163236	5	0.0730012	1
AA* + phosphate S/P=1		-0.454438	0.21762	-1.23445	0.275097	0.778727	0.124958	3.65555	0.124958	5	0.0558829	0.5
AA* + phosphate S/P=0.5		-0.64872	0.117936	-1.79452	0.250856	1.13181	0.180725	3.09548	0.180725	5	0.0808225
* batch 61301051
** for N=1, the 2s error is from standard reproducibility
*** post-column replicates

## Sheet: Tubes
Tubes
sample ID	material	blood collection tube	δ33S/32SAA	2𝜎	δ34S/32SAA	2𝜎	δ33S/34SAA	2𝜎	δ34S/32SVCDT	2𝜎	N	2𝜎/√N	collecting session # *
aa-99	plasma	green : Li heparin +gel	0.466432	0.460576	0.585973	0.299354	-0.102313	0.403999	5.47597	0.299354	3	0.172832
aa-P1	total blood	rose : neutral	0.631497	0.288074	0.934919	0.227136	-0.360433	0.0540721	5.82492	0.227136	3	0.131137	i
aa-P2	total blood	lavender : EDTA	0.764252	0.312611	1.15331	0.15012	-0.391955	0.259401	6.04331	0.15012	3	0.0866719	i
aa-P3	serum	rose : neutral + centrifugation	0.732821	0.229302	1.28486	0.278324	-0.554091	0.257537	6.17486	0.278324	4	0.139162	i
aa-P4	plasma	green : Li heparin +gel	0.490829	0.385498	1.0743	0.236657	-0.578711	0.439471	5.9643	0.236657	5	0.105836	i
aa-P5	serum	orange : activatorivateur + gel	0.744997	0.299091	1.36677	0.179859	-0.64432	0.187187	6.25677	0.179859	3	0.103842	i
aa-164	total blood	lavender : EDTA	0.429802	0.158306	0.588619	0.14172	-0.158578	0.0142865	5.47862	0.14172	3	0.0818223	ii
aa-170	serum	rose : neutral + centrifugation	0.29821	0.113837	0.0820287	0.48348	0.2458	0.359887	4.97203	0.48348	3	0.279137	ii
aa-173	serum	red : activator + centrifugation	0.207002	0.151362	0.187373	0.111498	0.0135244	0.251734	5.07737	0.111498	3	0.0643734	ii
aa-176	plasma	lavender : EDTA + centrifugation	0.454919	0.15	0.558182	0.1	-0.0696288	0.15	5.44818	0.1	1	0.1	ii
aa-179	plasma	green : Li heparin +gel	0.151701	0.225381	0.10406	0.334426	0.0376569	0.498186	4.99406	0.334426	2	0.236475	ii
aa-188	serum	red : activator + centrifugation	0.27101	0.118756	0.443735	0.0729658	-0.183923	0.170971	5.33374	0.0729658	3	0.0421268	iii
aa-185	plasma	lavender : EDTA + centrifugation	0.178974	0.15	0.381911	0.1	-0.198585	0.15	5.27191	0.1	1	0.1	iii
aa-185gl	RBC	osmotic choc RBC 185	0.772977	0.157017	1.50001	0.211803	-0.713918	0.0750311	6.39001	0.211803	2	0.149767
aa-185mb	membranes	osmotic choc RBC 185	0.0153429	0.0297549	-0.101627	0.0613895	0.141057	0.00374599	4.78837	0.0613895	2	0.0434089
aa-226N	plasma	lavender : EDTA + centrifugation	0.389347	0.0662986	0.551851	0.0618018	-0.158784	0.0937712	5.44185	0.0618018	2	0.0437005	iv
aa-230 N	serum	red : activator + centrifugation	0.594827	0.132107	1.09873	0.0860931	-0.502602	0.0962372	5.98873	0.0860931	6	0.0351474	iv
bb-E2	total blood	lavender : EDTA	0.680192	0.269815	1.12519	0.204998	-0.466007	0.147935	6.01519	0.204998	4	0.102499	v
bb-E4	plasma	green : Li heparin +gel	0.561606	0.265439	1.16577	0.408695	-0.581816	0.183584	5.96966	0.408695	4	0.204348	v
bb-E5	serum	orange : activatorivateur + gel	0.756131	0.238378	1.2533	0.127266	-0.494102	0.185798	6.1433	0.127266	4	0.0636328	v
bb-E1	total blood	rose : neutral	0.744613	0.334804	1.00493	0.291039	-0.309508	0.311794	5.89493	0.291039	5	0.130157	v
bb-E3	serum	rose : neutral + centrifugation	0.634841	0.256281	1.10191	0.471915	-0.465463	0.226338	5.99191	0.471915	5	0.211047	v
bb-162	total blood	lavender : EDTA	0.847285	0.926642	1.12208	0.193634	-0.257862	0.986827	6.01208	0.193634	3	0.111795	vi
bb-168	serum	rose : neutral + centrifugation	0.600779	0.101399	0.80207	0.250297	-0.18214	0.286525	5.69207	0.250297	3	0.144509	vi
bb-171	serum	red : activator + centrifugation	0.574926	0.152838	0.761829	0.150306	-0.190644	0.0900444	5.65183	0.150306	3	0.0867792	vi
bb-174	plasma	lavender : EDTA + centrifugation	0.330357	0.15	1.01749	0.1	-0.664484	0.15	5.90749	0.1	1	0.1	vi
bb-174 (RBC-23)	RBC	lavender : EDTA + centrifugation	0.634953	0.15	0.889226	0.1	-0.282363	0.15	5.77923	0.1	1	0.1	vi
bb-177	plasma	green : Li heparin +gel	0.49964	0.14501	0.802539	0.219143	-0.263091	0.0600722	5.69254	0.219143	2	0.154957	vi
bb-189	serum	red : activator + centrifugation	0.769335	0.170083	1.36363	0.178995	-0.590191	0.120673	6.25363	0.178995	3	0.103343	vii
bb-186	plasma	lavender : EDTA + centrifugation	0.85444	0.313118	1.64623	0.107309	-0.811625	0.336565	6.53623	0.107309	3	0.0619546	vii
bb-186E	plasma	lavender : EDTA + centrifugation	0.855391	0.15815	1.44181	0.266085	-0.593992	0.0727255	6.33181	0.266085	3	0.153624	vii
bb-186gl	RBC	osmotic choc RBC	0.855505	0.0911283	1.66206	0.123716	-0.818845	0.147306	6.55206	0.123716	4	0.061858
bb-186mb	membranes	osmotic choc RBC	0.44454	0.15	0.236274	0.1	0.163278	0.15	5.12627	0.1	1	0.1
bb-225N	plasma	lavender : EDTA + centrifugation	0.636135	0.0436895	1.39326	0.0372203	-0.74481	0.0533534	6.28326	0.0372203	2	0.0263187	viii
bb-229 N	serum	red : activator + centrifugation	0.965925	0.207947	1.68997	0.318966	-0.727806	0.132182	6.57997	0.318966	4	0.159483	viii
cc-163	total blood	lavender : EDTA	1.17422	0.7611	1.53975	0.141694	-0.397514	0.768579	6.42975	0.141694	3	0.0818073	ix
cc-169	serum	rose : neutral + centrifugation	1.04534	0.152164	1.59505	0.197108	-0.5666	0.157182	6.48505	0.197108	3	0.1138	ix
cc-172	serum	red : activator + centrifugation	0.878391	0.156603	1.47513	0.232584	-0.618626	0.136222	6.36513	0.232584	3	0.134283	ix
cc-175	plasma	lavender : EDTA + centrifugation	0.887309	0.0940134	1.71005	0.02525	-0.799544	0.0130163	6.60005	0.02525	2	0.0178544	ix
cc-178	plasma	green : Li heparin +gel	0.912855	0.141051	1.57087	0.119181	-0.64096	0.20163	6.46087	0.119181	2	0.0842739	ix
dd-111	plasma	green : Li heparin +gel	0.32	0.15	0.284802	0.1	-0.0558494	0.15	5.1748	0.1	1	0.1	x
dd-135	plasma	green : Li heparin +gel	0.14	0.238625	0.35566	0.440106	-0.292261	0.717952	5.24566	0.440106	2	0.311202	x
* collecting sessions refer to samples collected on the same day

## Sheet: Standards
Standard		δ33S/32SAA	2𝜎	δ34S/32SAA	2𝜎	δ33S/34SAA	2𝜎	δ34S/32SVCDT	2𝜎	N	2𝜎/√N
IAEA S1	Ag2S	-2.57348	0.12061	-5.15533	0.172122	2.59259	0.168063	-0.265327	0.172122	15	0.0444417
IAEA S2	Ag2S	8.91091	0.166035	17.3396	0.1081	-8.2902	0.187919	22.2296	0.1081	15	0.0279114
IAEA S3	Ag2S	-19.1513	0.251107	-36.986	0.310878	18.5233	0.242842	-32.096	0.310878	14	0.0830858
IAEA S4	elemental S	5.99462	0.256258	11.8136	0.231101	-5.75167	0.290423	16.7036	0.231101	16	0.0577751
SRM1577b	bovine liver	1.77406	0.178706	3.35686	0.0878111	-1.59521	0.244865	8.24686	0.0878111	4	0.0439055
SRM1577c	bovine liver	-1.19233	0.141087	-2.25671	0.0631528	1.0641	0.13545	2.63329	0.0631528	5	0.0282428
IA RO68	Soy protein	0.513945	0.134346	0.578174	0.0811832	0.642218	0.0880024	6.011	0.128713	3	0.0743123
IA RO69	Tuna protein	8.06284	0.125114	7.70821	0.0529294	7.23538	0.117625	20.3064	0.105859	5	0.0473415
Alfa Aesar 91100979	ammonium sulfate solution	-0.591003	0.171475	-1.13412	0.198874	0.552083	0.105438	3.75588	0.198874	5	0.0892203
Alfa Aesar 61301051 (in house standard)								4.89
Spex AF-14-163SY	ammonium sulfate solution	4.97292	0.146953	9.64878	0.217734	-4.61981	0.166609	14.5388	0.217734	5	0.0973737
PSA	ammonium persulfate	-2.1149	0.110384	-4.1078	0.229934	2.00085	0.13379	0.782205	0.229934	5	0.102829
	same after S purification	-2.29405	0.202888	-4.34003	0.15787	2.05513	0.138191	0.549967	0.15787	5	0.0706017
FBS 0800211408	fetal bovine serum	2.79055	0.170379	5.27842	0.201192	-2.45898	0.218023	10.1684	0.201192	9	0.067064
	same after Cu-Zn-Fe chemistry	2.78606	0.110173	5.42013	0.306993	-2.60165	0.223162	10.3101	0.306993	3	0.177243
FBS 0800211408-2	fetal bovine serum	2.87041	0.593829	5.21797	0.110288	-2.30912	0.566731	10.108	0.110288	3	0.0636747
FBS 0800211408-3	fetal bovine serum	2.86789	0.0592599	5.50551	0.0604176	-2.64026	0.0801392	10.3955	0.0604176	2	0.0427217
FBS 014M3399	Fetal Bovine Serum	-1.42863	0.134996	-2.72481	0.155837	1.29981	0.258054	2.16519	0.155837	6	0.0636203
	same after Cu-Zn-Fe chemistry	-1.60137	0.0887626	-3.12138	0.182377	1.50532	0.0574404	1.76862	0.182377	3	0.105295
FBS 014M3399-2	Fetal Bovine Serum	-1.55177	0.0758481	-2.7418	0.034937	1.18262	0.0939301	2.15	0.03	2	0.0415276
	same after Cu-Zn-Fe chemistry	-1.50292	0.317482	-2.89064	0.0631246	1.38736	0.292446	1.99936	0.0631246	2	0.0446358
BP3K 'free' S	M<3kDa	2.49987	0.15	4.68609	0.1	-2.18536	0.15	9.57609	0.1	1	0.1
BR50K 'large proteins'	M>50kDa	2.1808	0.15	4.91619	0.1	-2.73156	0.15	9.80619	0.1	1	0.1

## Sheet: Proteins
Protein size
sample	dilution	δ33S/32SAA	2𝜎	δ34S/32SAA	2𝜎	δ33S/34SAA	2𝜎	δ34S/32SVCDT	2𝜎	N	2𝜎/√N
bb-185 (lavender tube)		0.178974	0.15	0.381911	0.1	-0.198585	0.15	5.27191	0.1	1	0.1
bb-185-A1 proteins > 50 kDa	NaCl	0.428776	0.221797	0.691509	0.193368	-0.262458	0.011848	5.58151	0.193368	2	0.136732
bb-185-A2 proteins > 50 kDa	PBS	1.31854	0.0309909	2.45627	0.0162227	-1.13756	0.0238014	7.34627	0.0162227	3	0.00936615
bb-185-A3 proteins > 50 kDa	H2O	0.896411	0.18837	1.59092	0.0632478	-0.690335	0.196919	6.48092	0.0632478	4	0.0316239
bb-185-A4 free <3kDa	NaCl	-1.26881	0.15	-1.96167	0.1	0.772511	0.15	2.92833	0.1	1	0.1
bb-185-A5 free <3kDa	PBS	-0.0133686	1.1742	-4.00775	0.0284865	4.03614	1.18733	0.882252	0.0284865	2	0.020143
bb-185-A6 free <3kDa	H2O	-1.65066	0.15	-2.51426	0.1	0.819139	0.15	2.37574	0.1	1	0.1
aa-186E (lavender tube)		0.855391	0.15815	1.44181	0.266085	-0.593992	0.0727255	6.33181	0.266085	3	0.153624
aa-186-B1 proteins >50 kDa	NaCl	0.897387	0.192045	1.59493	0.0110243	-0.708798	0.192549	6.48493	0.0110243	2	0.00779534
aa-186-B2 proteins >50 kDa	PBS	1.45243	0.0980685	2.61064	0.123397	-1.13985	0.275444	7.50064	0.123397	2	0.087255
aa-186-B3 proteins >50 kDa	H2O	1.58109	0.110835	2.85309	0.166324	-1.28881	0.178029	7.74309	0.166324	3	0.0960274
aa-186-B4 free <3 kDa	NaCl	-2.61919	0.15	-5.16154	0.1	2.62142	0.15	-0.271536	0.1	1	0.1
aa-186-B5 free <3 kDa	PBS	-1.14579	0.15	-4.648	0.1	3.55185	0.15	0.241997	0.1	1	0.1
aa-186-B6 free <3 kDa	H2O	-0.396265	0.15	-1.35721	0.1	0.875579	0.15	3.53279	0.1	1	0.1

## Sheet: Medic
Medical samples
sample	sex	age	pathology*	material	tube	δ33S/32SAA	2𝜎	δ34S/32SAA	2𝜎	δ33S/34SAA	2𝜎	δ34S/32SVCDT	2𝜎	N	2𝜎/√N	S ppm
EFS C2	M	64	control	serum	red	0.621782	0.135256	1.17196	0.0225084	-0.549985	0.149425	6.06196	0.0225084	3	0.0129952	975.405
EFS C4	M	58	control	serum	red	0.49145	0.287334	0.917102	0.134413	-0.424333	0.296348	5.8071	0.134413	3	0.0776034	1109.51
EFS C6	M	58	control	serum	red	0.823779	0.27211	1.45278	0.256186	-0.628772	0.304735	6.34278	0.256186	4	0.128093	1039.87
EFS C8	M	58	control	serum	red	1.08608	0.17524	1.95213	0.161466	-0.874103	0.0554849	6.84213	0.161466	4	0.0807332	968.306
EFS c10	M	59	control	serum	red	1.00071	0.0721895	1.74829	0.297963	-0.746178	0.337439	6.63829	0.297963	3	0.172029	968.604
EFS C12	M	58	control	serum	red	0.61007	0.144503	1.06925	0.0931735	-0.468621	0.093453	5.95925	0.0931735	4	0.0465868	948.683
EFS C26	M	32	control	serum	red	0.492837	0.123385	1.05499	0.0678285	-0.543712	0.0829778	5.94499	0.0678285	4	0.0339143	1130.25
EFS C30	M	34	control	serum	red	0.486905	0.0800031	0.911739	0.0514391	-0.432519	0.0793055	5.80174	0.0514391	4	0.0257195	1084.68
EFS C32	M	21	control	serum	red	0.618239	0.105542	1.09881	0.0534766	-0.48076	0.10559	5.98881	0.0534766	4	0.0267383	1054.53
EFS C36	M	34	control	serum	red	0.769072	0.110808	1.51168	0.0565342	-0.755444	0.0878738	6.40168	0.0565342	4	0.0282671	1087.85
EFS C38	M	24	control	serum	red	0.679955	0.0908198	1.18703	0.0932957	-0.520332	0.0631178	6.07703	0.0932957	4	0.0466478	1023.13
EFS C51	F	51	control	serum	red	0.564565	0.0668427	1.07788	0.0957922	-0.518463	0.0424256	5.96788	0.0957922	4	0.0478961	959.643
EFS C52	F	52	control	serum	red	0.66698	0.0664493	1.34453	0.266505	-0.697413	0.263208	6.23453	0.266505	4	0.133253	1116.69
EFS C53	F	57	control	serum	red	0.641313	0.0992228	1.07698	0.0817524	-0.433905	0.0461115	5.96698	0.0817524	4	0.0408762	1067.16
EFS C54	F	60	control	serum	red	0.503672	0.158143	0.850148	0.0405293	-0.343733	0.140927	5.74015	0.0405293	4	0.0202646	1011.07
EFS C61	F	32	control	serum	red	0.356379	0.134599	0.798476	0.137692	-0.453404	0.150475	5.68848	0.137692	4	0.0688462	1265.68
EFS C63	F	33	control	serum	red	0.299115	0.117241	0.570755	0.117045	-0.276267	0.21359	5.46076	0.117045	3	0.0675761	1028.61
EFS C64	F	29	control	serum	red	0.655251	0.26806	1.38796	0.228344	-0.731964	0.136103	6.27796	0.228344	3	0.131835	1107.31
EFS C65	F	28	control	serum	red	0.645977	0.0754461	1.21907	0.130142	-0.577401	0.129596	6.10907	0.130142	3	0.0751373	1059.88
EFS C28	F	34	control	serum	red	0.367891	0.13837	0.695231	0.149448	-0.315833	0.213143	5.58523	0.149448	3	0.0862836	1113.69
EFS C34	F	22	control	serum	red	0.272334	0.149712	0.376157	0.245623	-0.0997103	0.212802	5.26616	0.245623	4	0.122812	1052.02
EFS C40	F	29	control	serum	red	0.434664	0.087176	0.872421	0.259916	-0.406215	0.35684	5.76242	0.259916	4	0.129958	1130.38
EFS C49	F	61	control	serum	red	0.537978	0.208677	0.98861	0.0641067	-0.439326	0.0875696	5.87861	0.0641067	2	0.0453303	1107.4
EFS C50	F	50	control	serum	red	0.617132	0.0463269	1.14963	0.103628	-0.516939	0.0142508	6.03963	0.103628	2	0.0732758	1034.13
EFS C67	F	22	control	serum	red	0.485005	0.0598131	0.706325	0.0647072	-0.227463	0.0241796	5.59632	0.0647072	2	0.0457549	1045.92
AF 048	M	11	control	serum	red	0.711156	0.1058	1.31984	0.23302	-0.61049	0.24125	6.20984	0.23302	3	0.134534	962.881
AL 013	M	13	control	serum	red	0.802432	0.109649	1.57739	0.0137694	-0.766741	0.143815	6.46739	0.0137694	3	0.00794976	992.784
AV 052	M	12	control	serum	red	0.837982	0.0593721	1.46657	0.166969	-0.608941	0.0911002	6.35657	0.166969	2	0.118065	959.928
AV 50	M	13.0027	control	serum	red	0.579242	0.0292197	1.04203	0.100675	-0.482916	0.0976465	5.93203	0.100675	2	0.0711877	1019.33
BR 042	M	13	control	serum	red	0.475983	0.193124	0.822313	0.153602	-0.34974	0.163975	5.71231	0.153602	3	0.0886824	975.974
EP 029	M	15	control	serum	red	0.524887	0.163088	0.990823	0.249507	-0.470906	0.291128	5.88082	0.249507	3	0.144053	971.309
LC 019	M	11	control	serum	red	0.81377	0.24266	1.56882	0.0598621	-0.75941	0.301795	6.45882	0.0598621	3	0.0345614	941.719
LR 039	M	14	control	serum	red	0.900247	0.15	1.65189	0.1	-0.78813	0.15	6.54189	0.1	1	0.1	1013.29
MD 018	M	14	control	serum	red	1.31885	0.0571373	2.33117	0.06591	-1.02603	0.160235	7.22117	0.06591	2	0.0466054	987.398
ML 034	M	16	control	serum	red	0.41849	0.0513042	0.832302	0.163775	-0.406314	0.0873424	5.7223	0.163775	3	0.0945556	886.94
PET 015	M	12	control	serum	red	1.03114	0.0488713	1.90701	0.0365423	-0.865286	0.0314817	6.79701	0.0365423	2	0.0258393	908.271
TB 012	M	11	control	serum	red	1.39784	0.399004	2.63635	0.413703	-1.24445	0.125125	7.52635	0.413703	2	0.292532	1113.78
TC 006	M	13	control	serum	red	0.900457	0.373118	1.48261	0.139018	-0.613811	0.197287	6.37261	0.139018	2	0.0983003	966.644
TD 044	M	12	control	serum	red	1.11577	0.183406	2.00316	0.142186	-0.859737	0.260216	6.89316	0.142186	3	0.0820909	950.163
AZ 056	F	14	control	serum	red	0.568312	0.243385	0.950666	0.231091	-0.362335	0.00433027	5.84067	0.231091	2	0.163406	968.781
CB 054	F	11	control	serum	red	0.576478	0.0806348	0.897445	0.0587774	-0.317245	0.0623299	5.78744	0.0587774	2	0.0415619	1007.5
CJ 035	F	16	control	serum	red	0.566236	0.00264635	0.839607	0.148868	-0.287843	0.142624	5.72961	0.148868	2	0.105266	1031.52
CR 003	F	15	control	serum	red	0.708682	0.187162	1.12314	0.120107	-0.398171	0.233433	6.01314	0.120107	3	0.0693439	942.466
ER 004	F	13	control	serum	red	0.957153	0.0186461	1.78297	0.00782874	-0.817508	0.0533788	6.67297	0.00782874	2	0.00553576	1030.64
JP 027	F	17	control	serum	red	0.247046	0.294867	0.577103	0.0298278	-0.333719	0.303252	5.4671	0.0298278	3	0.0172211	964.123
JR 038	F	12	control	serum	red	0.834325	0.144587	1.49576	0.0982116	-0.651334	0.229271	6.38576	0.0982116	3	0.0567025	1050.71
JR 041	F	11	control	serum	red	0.788277	0.042213	1.42773	0.0569468	-0.640116	0.0722857	6.31773	0.0569468	2	0.0402675	981.496
LC 030	F	15	control	serum	red	1.11688	0.156133	2.03961	0.23549	-0.880427	0.0975006	6.92961	0.23549	2	0.166516	1047.42
LD 043	F	14	control	serum	red	0.690822	0.144185	1.25046	0.0539006	-0.593731	0.27758	6.14046	0.0539006	2	0.0381134	893.679
LR 040	F	14	control	serum	red	0.810781	0.0212246	1.42827	0.208272	-0.629824	0.135681	6.31827	0.208272	2	0.147271	929.995
LR 053	F	13	control	serum	red	0.424147	0.147626	0.721179	0.253564	-0.285039	0.10946	5.61118	0.253564	3	0.146395	1003.91
LS 045	F	14	control	serum	red	0.570301	0.170165	1.02111	0.193334	-0.436189	0.0943255	5.91111	0.193334	3	0.111621	942.176
LV 049	F	16	control	serum	red	0.980509	0.089175	1.76163	0.172646	-0.785271	0.144231	6.65163	0.172646	2	0.122079	955.11
Ma 017	F	11	control	serum	red	0.69857	0.242164	1.25827	0.0261784	-0.539455	0.338993	6.14827	0.0261784	2	0.0185109	966.815
MF 047	F	14	control	serum	red	0.634143	0.165381	1.13438	0.317322	-0.468946	0.192959	6.02438	0.317322	3	0.183206	1353.92
ML 046	F	11	control	serum	red	0.502257	0.126089	0.832651	0.0201945	-0.314332	0.13986	5.72265	0.0201945	3	0.0116593	914.71
QV 051	F	12	control	serum	red	0.895736	0.204648	1.46881	0.16843	-0.574263	0.14598	6.35881	0.16843	3	0.0972431	988.479
SC 031	F	17	control	serum	red	1.10758	0.215225	2.0803	0.23892	-0.974249	0.0841827	6.9703	0.23892	3	0.137941	1034.98
TG 025	F	15	control	serum	red	0.471382	0.126584	0.943582	0.0378469	-0.470095	0.145776	5.83358	0.0378469	2	0.0267618	1062.98
14435	M	57	rheumatoid arthitis	plasma	lavender	0.105979	0.15	0.231714	0.1	-0.110052	0.15	5.12171	0.1	1	0.1
15574	M	56	rheumatoid arthitis	plasma	lavender	1.09048	0.143337	2.03189	0.0313564	-0.931044	0.231172	6.92189	0.0313564	2	0.0221723
20279	M	61	rheumatoid arthitis	plasma	lavender	0.894245	0.15	1.55977	0.1	-0.678694	0.15	6.44977	0.1	1	0.1
5604	F	73	rheumatoid arthitis	plasma	lavender	0.692243	0.196567	1.14042	0.359146	-0.460833	0.0141177	6.03042	0.359146	2	0.253955
10370	F	85	rheumatoid arthitis	plasma	lavender	1.1201	0.053824	1.89139	0.166124	-0.820654	0.214693	5.05612	0.231714	2	0.163847
15961	F	73	rheumatoid arthitis	plasma	lavender	1.2514	0.139196	2.09925	0.427783	-0.864645	0.591852	6.98925	0.427783	2	0.302488
16418	F	58	rheumatoid arthitis	plasma	lavender	0.629149	0.15	1.17582	0.1	-0.544887	0.15	6.06582	0.1	1	0.1
16552	F	65	rheumatoid arthitis	plasma	lavender	0.894245	0.15	1.55977	0.1	-0.678694	0.15	6.44977	0.1	1	0.1
17103	F	62	rheumatoid arthitis	plasma	lavender	0.872351	0.0408353	1.43075	0.273875	-0.538616	0.346397	6.32075	0.273875	2	0.193659
20937	F	68	rheumatoid arthitis	plasma	lavender	0.894245	0.15	1.55977	0.1	-0.678694	0.15	6.44977	0.1	1	0.1
191H	M	56	HBV	serum	red	0.966845	0.396916	1.74817	0.440491	-0.783668	0.204596	6.63817	0.440491	5	0.196993	709.993
196H	M	42	HCV-HCC	serum	red	0.873097	0.0354125	1.70569	0.0835332	-0.828638	0.0330061	6.59569	0.0835332	2	0.0590669	655.882
201H	M	57	Metabolic+HCC	serum	red	1.17976	0.15	2.15412	0.1	-0.984129	0.15	7.04412	0.1	1	0.1
203H	M	42	HCV	serum	red	0.789541	0.270259	1.49734	0.0225762	-0.691832	0.25149	6.38734	0.0225762	3	0.0130344	681.438
205H	M	55	HCV-HCC	serum	red	0.906744	0.190656	1.70707	0.210722	-0.794975	0.306318	6.59707	0.210722	3	0.121661	824.547
206H	M	50	Metabolic+HCC	serum	red	0.764487	0.296906	1.44677	0.404427	-0.672349	0.0438988	6.33677	0.404427	3	0.233496	799.325
208H	M	62	Metabolic+HCC	serum	red	0.48403	0.143496	0.893587	0.0433499	-0.413794	0.0987492	5.78359	0.0433499	4	0.021675	712.548
215H	M	61	HBV-HCC	serum	red	0.958907	0.2235	1.70501	0.0889709	-0.721033	0.175694	6.59501	0.0889709	3	0.0513674	657.105
217H	M	46	HBV	serum	red	0.790534	0.318377	1.51069	0.0837469	-0.693942	0.385082	6.40069	0.0837469	2	0.059218	691.438
219H	M	65	HBV	serum	red	0.895978	0.181981	1.73136	0.217788	-0.807349	0.0747359	6.62136	0.217788	3	0.12574	794.103
220H	M	60	HBV-HCC	serum	red	1.28181	0.200304	2.21606	0.16022	-0.930874	0.0464742	7.10606	0.16022	4	0.0801102	911.88
221H	M	59	HBV-HCC	serum	red	0.989296	0.16033	1.91763	0.00582193	-0.909823	0.223631	6.80763	0.00582193	3	0.00336129	796.77
192H	F	62	HCV-HCC	serum	red	0.950849	0.247969	1.83101	0.123953	-0.868965	0.168171	6.72101	0.123953	3	0.0715641	906.102
198H	F	52	Liver metabolic	serum	red	0.982886	0.10061	1.63847	0.130034	-0.661144	0.115958	6.52847	0.130034	3	0.0750749	601.438
202H	F	49	Liver metabolic	serum	red	0.928232	0.164641	1.81998	0.248359	-0.858201	0.1677	6.70998	0.248359	3	0.14339	649.216
218H	F	47	Liver metabolic	serum	red	0.95652	0.0226132	1.63072	0.0602911	-0.673512	0.103109	6.52072	0.0602911	3	0.0348091	718.104
CF1	F	47	Liver metabolic	ressections	red	1.35294	0.065256	2.2577	0.151265	-0.896836	0.161489	7.1477	0.151265	3	0.0873329
CF2	F	49	Liver metabolic	ressections	red	5.98496	0.169498	11.5284	0.241516	-5.47829	0.125581	16.4184	0.241516	4	0.120758
CF10	H	59	HBV-HCC	ressections	red	1.95807	0.166439	3.85499	0.449864	-1.89448	0.307418	8.74499	0.449864	2	0.318102
CF4	F	52	Liver metabolic	ressections	red	2.05356	0.288901	3.84497	0.131593	-1.78063	0.481482	8.73497	0.131593	2	0.0930506
CF8	H	60	HBV-HCC	ressections	red	1.63442	0.204735	2.87357	0.195151	-1.24587	0.195184	7.76357	0.195151	4	0.0975757
CF9	H	61	HBV-HCC	ressections	red	2.01516	0.0325923	3.5405	0.203972	-1.51795	0.226533	8.4305	0.203972	4	0.101986
CF11	H	56	HBV	ressections	red	4.4167	0.236951	8.55284	0.479116	-4.10559	0.22021	13.4428	0.479116	3	0.276618
CF14	H	69	HBV	ressections	red	0.957129	0.243576	1.72463	0.190881	-0.758551	0.374712	6.61463	0.190881	3	0.110205
CF15	H	47	HBV	ressections	red	1.3208	0.112966	2.28944	0.0858271	-0.937341	0.191386	7.17944	0.0858271	2	0.0606889
CF16	H	50	Metabolic+HCC	ressections	red	1.09388	0.358524	1.77953	0.198299	-0.6711	0.216368	6.66953	0.198299	3	0.114488
CF19	H	57	Metabolic+HCC	ressections	red	1.47455	0.149248	2.67496	0.0116051	-1.20261	0.173652	7.56496	0.0116051	3	0.00670019
CF20	H	61	Metabolic+HCC	ressections	red	1.13015	0.200917	2.22015	0.432493	-1.08091	0.233238	7.11015	0.432493	4	0.216247
CF22	F	62	HCV-HCC	ressections	red	1.85892	0.179981	3.47284	0.416834	-1.62079	0.58919	8.36284	0.416834	2	0.294746
CF23	H	55	HCV-HCC	ressections	red	1.07037	0.224329	2.17784	0.0832199	-1.1181	0.273518	7.06784	0.0832199	3	0.048047
CF24	H	42	HCV-HCC	ressections	red	1.85212	0.3269	3.31969	0.361644	-1.44972	0.259849	8.20969	0.361644	3	0.208795
CF26	F	44	HCV	ressections	red	0.44936	0.00907659	0.713869	0.0516049	-0.26848	0.0527619	5.60387	0.0516049	2	0.0364902
CF27	H	42	HCV	ressections	red	0.966447	0.124091	1.60262	0.128703	-0.636528	0.217765	6.49262	0.128703	3	0.0743069
CF28	F	36	HCV	ressections	red	1.26911	1.34351	3.89167	0.051963	-2.62305	1.31378	8.78167	0.051963	2	0.0367434
222H	M	64.7041	HCV	serum	red	0.822021	0.103816	1.45505	0.141399	-0.634457	0.162695	6.34505	0.141399	8	0.0499922	650
223H	M	73.2301	HBV	serum	red	0.371186	0.271818	0.752777	0.525823	-0.394963	0.263519	5.64278	0.525823	2	0.371813	704
224H	M	37.1151	HCV	serum	red	0.820547	0.0742688	1.61054	0.339794	-0.793896	0.160387	6.50054	0.339794	2	0.240271	752
227H	M	46.6384	HBV	serum	red	0.433752	0.104981	0.68508	0.237868	-0.237126	0.161155	5.57508	0.237868	3	0.137333	597
229 H	M	48.0658	HBV	serum	red	0.496895	0.2144	0.802222	0.317386	-0.332898	0.164576	5.69222	0.317386	2	0.224426	688
230 H	M	42.4247	HCV	serum	red	0.524747	0.067621	0.845983	0.249611	-0.318138	0.34839	5.73598	0.249611	3	0.144113	668
231 H	M	60.5534	Liver metabolic	serum	red	0.49819	0.174486	0.898388	0.263014	-0.415589	0.0938748	5.78839	0.263014	3	0.151851	599
232 H	M	37.0877	Metabolic+HBV	serum	red	0.397758	0.221403	0.655618	0.0810295	-0.24864	0.150691	5.54562	0.0810295	2	0.0572965	618
234 H	M	43.9534	Liver metabolic	serum	red	0.827825	0.101623	1.50229	0.102076	-0.659836	0.0487458	6.39229	0.102076	3	0.0589333	646
235H	M	46.3534	HCV	serum	red	0.280269	0.0911333	0.502329	0.114167	-0.209542	0.181155	5.39233	0.114167	4	0.0570835	676
236H	M	51.6658	HCV	serum	red	0.328347	0.1965	0.541139	0.318721	-0.221072	0.220382	5.43114	0.318721	4	0.159361	614
241 H	M	49.1808	Metabolic+HCV	serum	red	0.570409	0.20751	0.854377	0.342296	-0.259125	0.359284	5.74438	0.342296	3	0.197625	676
242 H	M	40.4849	HBV	serum	red	0.689212	0.17155	1.26316	0.313269	-0.568275	0.167495	6.15316	0.313269	3	0.180866	683
243 H	M	56.2247	HCV	serum	red	0.564712	0.133495	0.970703	0.0437491	-0.404731	0.00337505	5.8607	0.0437491	2	0.0309353	678
225H	F	38.6164	Metabolic + HCV	serum	red	1.04125	0.0770971	1.68445	0.0366853	-0.654158	0.0388648	6.57445	0.0366853	2	0.0259404	665
226H	F	76.5616	HCV	serum	red	0.464732	0.18588	0.75032	0.247586	-0.279331	0.275638	5.64032	0.247586	3	0.142944	651
228 H	F	29.6521	Autoimmune cholangitis	serum	red	0.841772	0.0684209	1.4862	0.156629	-0.667207	0.136238	6.3762	0.156629	2	0.110754	603
233 H	F	20.5233	Autoimmune hepatitis	serum	red	0.281141	0.193016	0.414452	0.292691	-0.166182	0.205352	5.30445	0.292691	2	0.206964	590
237 H	F	65.0493	HBV	serum	red	0.25426	0.122448	0.589185	0.00961128	-0.304697	0.042551	5.47919	0.00961128	2	0.0067962	687
238 H	F	63.2466	HCV	serum	red	0.873755	0.0963626	1.50506	0.0843143	-0.644579	0.217753	6.39506	0.0843143	2	0.0596192	714
239 H	F	43.1425	HCV	serum	red	0.335133	0.0894885	0.451182	0.0378222	-0.121333	0.0081612	5.34118	0.0378222	2	0.0267443	684
240H	F	60.6548	HCV	serum	red	0.424502	0.116385	0.681768	0.121448	-0.252139	0.063258	5.57177	0.121448	3	0.0701178	639
244 H	F	34.0685	HBV	serum	red	1.91673	0.177726	3.58243	0.0988379	-1.6572	0.274748	8.47243	0.0988379	2	0.069889	682
245 H	F	60.2466	Primary biliary cirrhosis	serum	red	0.227987	0.0285561	0.300889	0.103498	-0.0835683	0.105734	5.19089	0.103498	2	0.0731844	671
272 H	M	34	HBV/HDV	serum	red	0.800019	0.0606667	1.65335	0.270409	-0.845761	0.189674	6.54335	0.270409	2	0.191208	770.167
273 H	M	50	Hemochromatosis C282Y homozygote	serum	red	0.426734	0.0596413	0.872165	0.00828309	-0.436746	0.156174	5.76217	0.00828309	2	0.00585703	677.667
274 H	F	64	HCV1b + Autoimmune	serum	red	1.00034	0.015323	1.8389	0.0764795	-0.838998	0.0320741	6.7289	0.0764795	2	0.0540792	638.667
275 H	F	68	Liver metabolic	serum	red	0.362956	0.0218032	0.684473	0.0779092	-0.322088	0.0236808	5.57447	0.0779092	2	0.0550901	653.333
276 H	M	33	HCV4d	serum	red	0.58855	0.15	1.15294	0.1	-0.538941	0.15	6.04294	0.1	1	0.1	809.833
277 H	F	53	HCV3a	serum	red	0.290017	0.00419861	0.424276	0.0482931	-0.182325	0.0918399	5.31428	0.0482931	2	0.0341484	677.833
278 H	F	65	HCV1b HCV	serum	red	0.590803	0.0334047	1.11048	0.0777625	-0.546897	0.0296699	6.00048	0.0777625	2	0.0549864	691.667
279 H	F	43	Liver metabolic	serum	red	0.717805	0.168759	1.34763	0.213218	-0.63564	0.0121994	6.23763	0.213218	2	0.150768	653.333
280H	M	56	HCV1a	serum	red	0.70512	0.045791	1.42416	0.0787601	-0.717855	0.0857793	6.31416	0.0787601	2	0.0556918	727.167
281 H	F	58	HCV1a + Autoimmune	serum	red	1.05901	0.198318	2.01074	0.0827009	-0.879277	0.0965166	6.90074	0.0827009	2	0.0584784	675.5
282 H	F	45	Primary biliary cirrhosis	serum	red	0.994465	0.0447812	1.97223	0.0986361	-0.975091	0.0838112	6.86223	0.0986361	2	0.0697463	740.667
283 H	F	39	HCV1b	serum	red	1.29914	0.15	2.4731	0.1	-1.11641	0.15	6.12655	0.1	1	0.1	707.667
2 N	M	68	liver cancer no genotype	serum	red	0.953436	0.209538	1.67345	0.278789	-0.713548	0.0882153	6.56345	0.278789	3	0.160959
4 N	M	55	HCV	serum	red	1.67517	0.0160754	3.167	0.133373	-1.50772	0.139497	8.057	0.133373	2	0.0943088
5 N	M	50	HCV	serum	red	0.912084	0.536531	1.72084	0.430649	-0.819026	0.0853995	6.61084	0.430649	2	0.304514
8 N	M	55	liver cancer no genotype	serum	red	0.680956	0.318432	1.16589	0.026962	-0.495755	0.340558	6.05589	0.026962	2	0.019065
11 N	M	62	HCV	serum	red	0.708495	0.316114	1.3046	0.0435131	-0.620562	0.342429	6.1946	0.0435131	2	0.0307684
12 N	M	52	HCV	serum	red	1.20486	0.133932	2.25269	0.264378	-1.02917	0.148944	7.14269	0.264378	2	0.186944
14 N	M	44	HCV	serum	red	1.09215	0.0334092	1.91783	0.152956	-0.827786	0.108808	6.80783	0.152956	2	0.108156
15 N	F	70	HCV	serum	red	0.268966	0.0788301	0.480752	0.119862	-0.215553	0.156635	5.37075	0.119862	2	0.0847553
18 N	F	55	HCV	serum	red	0.787095	0.0831188	1.36042	0.152354	-0.567678	0.0902617	6.25042	0.152354	2	0.107731
24 N	M	47	HCV	serum	red	0.388303	0.0892051	0.629708	0.447414	-0.238991	0.279527	5.51971	0.447414	2	0.316369
27 N	F	58	HCV HCC	serum	red	-0.196651	0.0506765	-0.346604	0.0302656	0.144329	0.0717755	4.5434	0.0302656	2	0.021401
28 N	F	54	HCV HCC	serum	red	0.263073	0.15	0.400865	0.1	-0.116638	0.15	5.29087	0	1	0.1
29 N	H	50	Metabolic+HCC+HCV	serum	red	0.964105	0.205133	1.58209	0.0313536	-0.610721	0.2264	6.47209	0.0313536	2	0.0221704
30 N	F	78	HCV	serum	red	0.608028	0.15	0.967519	0.1	-0.358236	0.15	5.85752	0	1	0.1
31 N	F	77	HCV	serum	red	0.840796	0.140746	1.5777	0.157508	-0.733749	0.0290391	6.4677	0.157508	2	0.111375
33 N	F	40	HCV	serum	red	1.14139	0.540182	1.81916	0.226665	-0.682637	0.323574	6.70916	0.226665	2	0.160277
36 N	M	32	HCV	serum	red	0.576689	0.0734334	0.799539	0.0149492	-0.225842	0.0827894	5.68954	0.0149492	2	0.0105707
40 N	M	71	HBV	serum	red	0.476543	0.209697	0.685827	0.283978	-0.19773	0.049564	5.57583	0.283978	2	0.200803
F1	M	76.9699	HCC	serum	red	0.700379	0.474035	1.25783	0.16654	-0.564833	0.342543	6.14783	0.16654	5	0.0744789
F2	M	72.1014	HCC	serum	red	1.02536	0.430748	1.67273	0.14231	-0.601135	0.277944	6.56273	0.14231	5	0.0636429
F3	M	74.9233	HCC	serum	red	0.972676	0.433797	1.76184	0.166459	-0.797886	0.621799	6.65184	0.166459	3	0.096105
F4	M	55.0959	HCC	serum	red	0.956748	0.255812	1.85461	0.0870816	-0.879127	0.374987	6.74461	0.0870816	5	0.0389441
F5	M	50.3452	HCC	serum	red	0.580688	0.246855	1.01971	0.143594	-0.396425	0.369444	5.90971	0.143594	4	0.0717968
F6	M	82.5781	HCC	serum	red	1.28146	0.425588	2.39519	0.14983	-1.09818	0.338767	7.28519	0.14983	4	0.0749148
F7	M	48.7342	HCC	serum	red	0.816418	0.323366	1.61023	0.269316	-0.750595	0.11443	6.50023	0.269316	4	0.134658
F8	M	58.7205	HCC	serum	red	0.925127	0.537343	1.57257	0.238121	-0.675073	0.401663	6.46257	0.238121	4	0.119061
F9	M	41.3068	HCC	serum	red	0.666378	0.186908	1.24784	0.280882	-0.577107	0.126592	6.13784	0.280882	2	0.198613
F11	M	62.2822	HCC	serum	red	0.686463	0.233786	1.20486	0.10883	-0.512728	0.157055	6.09486	0.10883	4	0.0544152
F12	M	51.5178	HCC	serum	red	1.04112	0.318495	2.08216	0.103404	-1.03503	0.270538	6.97216	0.103404	4	0.051702
F14	M	44.1178	HCC	serum	red	0.850543	0.492916	1.46915	0.233178	-0.579016	0.415907	6.35915	0.233178	4	0.116589
F16	M	49.4411	HCC	serum	red	0.662669	0.08648	1.07448	0.034953	-0.39076	0.0635446	5.96448	0.034953	2	0.0247155
F17	M	52.1726	HCC	serum	red	0.29965	0.0357875	0.796937	0.131278	-0.497894	0.0859572	5.68694	0.131278	2	0.0928274
F19	M	33.8247	HCC	serum	red	1.02018	0.15	1.89576	0.1	-0.886762	0.15	6.78576	0.1	1	0.1
F23	M	54.3753	HCC	serum	red	0.40043	0.26696	1.01933	0.150751	-0.590393	0.455983	5.90933	0.150751	2	0.106597
F24	M	47.3014	HCC	serum	red	0.549215	0.0128561	1.32612	0.154417	-0.742177	0.10049	6.21612	0.154417	2	0.109189
F10	F	71.3808	HCC	serum	red	0.259549	0.512443	0.444038	0.166918	-0.166908	0.343216	5.33404	0.166918	4	0.0834592
F13	F	57.4329	HCC	serum	red	0.210899	0.432734	0.390823	0.107919	-0.173546	0.445182	5.28082	0.107919	4	0.0539597
F15	F	69.7151	HCC	serum	red	0.405769	0.242155	0.688994	0.0923972	-0.2881	0.264212	5.57899	0.0923972	4	0.0461986
F18	F	54.7973	HCC	serum	red	1.09362	0.0411755	1.84407	0.104095	-0.736105	0.0171171	6.73407	0.104095	2	0.0736061
F20	F	55.3808	HCC	serum	red	0.704695	0.15	0.749496	0.1	-0.0560651	0.15	5.6395	0.1	1	0.1
F21	F	69.7918	HCC	serum	red	0.31653	0.15	0.314784	0.1	-0.0211898	0.15	5.20478	0.1	1	0.1
F22	F	50.4164	HCC	serum	red	0.703645	0.266342	1.34376	0.135918	-0.620296	0.0973025	6.23376	0.135918	2	0.0961085
F25	no data		control	serum	red	0.793829	0.15	1.57296	0.1	-0.775557	0.15	6.46296	0.1	1	0.1
F26	no data		control	serum	red	0.286281	0.15	0.554514	0.1	-0.268527	0.15	5.44451	0.1	1	0.1
F49	M	76	Liver metabolic	serum	red	0.758954	0.0648353	1.53302	0.107754	-0.787025	0.292711	6.42302	0.107754	2	0.0761937
F50	M	61	hemochromatosis	serum	red	0.921495	0.163024	1.94449	0.242236	-1.03921	0.244453	6.83449	0.242236	2	0.171287
692	M	64	prostate cancer	serum	red	1.01702	0.0119882	1.59844	0.00171524	-0.58312	0.0225785	6.48844	0.00171524	2	0.00121286
758	M	66	prostate cancer	serum	red	1.09436	0.265744	1.74045	0.0278784	-0.644535	0.243808	6.63045	0.0278784	2	0.019713
1055	M	67	prostate cancer	serum	red	1.07869	0.604778	1.74135	0.201963	-0.64751	0.460813	6.63135	0.201963	3	0.116603
1065	M	75	prostate cancer	serum	red	0.78939	0.0171556	1.27762	0.0971293	-0.466148	0.144531	6.16762	0.0971293	2	0.0686808
1987	M	71	prostate cancer	serum	red	1.14337	0.429672	1.84124	0.149403	-0.709555	0.281017	6.73124	0.149403	2	0.105644
2007	M	78	prostate cancer	serum	red	0.704252	0.308702	1.06333	0.0734104	-0.344549	0.153921	5.95333	0.0734104	2	0.051909
17-1	F	39	breast cancer	serum	red	0.89167	0.368029	1.63664	0.35078	-0.757448	0.406216	6.52664	0.35078	5	0.156874
17-2	F	39	breast cancer	serum	red	1.00609	0.381992	1.96835	0.374845	-0.959692	0.377197	6.85835	0.374845	4	0.187422
17-3	F	39	breast cancer	serum	red	0.954404	0.324184	1.84617	0.299568	-0.87124	0.0851373	6.73617	0.299568	3	0.172955
17-4	F	39	breast cancer	serum	red	1.11656	0.367871	1.9569	0.364674	-0.815825	0.394018	6.8469	0.364674	4	0.182337
18-1	F	54	breast cancer	serum	red	0.742901	0.229134	1.37004	0.187958	-0.597655	0.0633151	6.26004	0.187958	3	0.108517
18-2	F	54	breast cancer	serum	red	0.505803	0.113594	0.79187	0.306142	-0.305632	0.351817	5.68187	0.306142	5	0.136911
18-3	F	54	breast cancer	serum	red	0.37565	0.0850171	0.6611	0.198518	-0.282936	0.177454	5.5511	0.198518	3	0.114614
18-4	F	54	breast cancer	serum	red	0.295612	0.332507	0.470315	0.177518	-0.152196	0.434853	5.36031	0.177518	3	0.10249
19-1	F	49	breast cancer	serum	red	0.67548	0.283612	1.30657	0.0556773	-0.622052	0.11451	6.19657	0.0556773	2	0.0393698
19-2	F	49	breast cancer	serum	red	0.436168	0.177642	0.871165	0.186598	-0.438167	0.0982895	5.76117	0.186598	3	0.107732
19-3	F	49	breast cancer	serum	red	0.233735	0.272164	0.704514	0.174386	-0.500038	0.0401081	5.59451	0.174386	2	0.12331
19-4	F	49	breast cancer	serum	red	0.364049	0.15	0.767865	0.1	-0.404315	0.15	5.65787	0.1	1	0.1
20-1	F	38	breast cancer	serum	red	0.703888	0.268574	1.15555	0.262453	-0.450027	0.186292	6.04555	0.262453	3	0.151527
20-2	F	38	breast cancer	serum	red	0.619569	0.15	0.780391	0.1	-0.15698	0.15	5.67039	0.1	1	0.1
20-3	F	38	breast cancer	serum	red	0.0626133	0.15	-0.13817	0.1	0.21659	0.15	4.75183	0.1	1	0.1
20-4	F	38	breast cancer	serum	red	0.0463258	0.15	-0.0644671	0.1	0.125512	0.15	4.82553	0.1	1	0.1
Aus 13	F	49	bronchus cancer	plasma	lavender	4.30815	0.194489	8.533	0.260886	-4.19526	0.443821	13.423	0.260886	3	0.150623
Aus 25	F	65	breast cancer	plasma	gold	3.56978	0.13939	6.88146	0.122606	-3.30291	0.0475908	11.7715	0.122606	2	0.0866958
Aus 64	F	57	colon cancer	serum	gold	3.43252	0.0682926	6.45955	0.130003	-3.01429	0.0658686	11.3496	0.130003	2	0.0919262
Aus 65	M	57	colon cancer	plasma	lavender	3.85396	0.35322	6.98084	0.0904194	-3.16284	0.366253	11.8708	0.0904194	3	0.0522037
Aus 57	M	64	colon cancer	serum	gold	3.59239	0.4533	6.58117	0.137859	-2.95967	0.397488	11.4712	0.137859	5	0.0616522
*Metabolic = alcoholic cirrhosis; HBV hepatitis B viral; HCV hepatitis C viral; HCC hepatocellular carcinoma

## Sheet: Stats
	Group		average	2s	n
	control		6.14181	0.917645	59
	control.adult		5.9776	0.709684	25
	control.adult.male		6.16962	0.684132	11
	control.adult.female		5.82673	0.589019	14
	control.child		6.26256	0.985856	34
	control.child.male		6.43516	1.08332	14
	control.child.female		6.14173	0.857789	20
	arthritis		6.18553	1.31006	10
	arthritis.male		6.16446	1.86677	3
	arthritis.female		6.19456	1.18807	7
	liver.cancer		6.10423	1.30226	78
	liver.cancer.naive		5.92273	1.37063	24
	liver.cancer.medicated		6.18697	1.30919	43
	prostate.cancer		6.43374	0.613748	6
	breast.cancer		5.8953	1.29642	16
	cancer.victoria		11.9772	1.67152	5

## Sheet: EAIRMS vs MCICPMS
Comparison HCC samples EA-IRMS (Balter et al., 2015) and MC-ICPMS (this work)
		MC-ICPMS		EA-IRMS
sample #	nature	1	2
259	serum	4.37	4.33484	2.69
162	serum	1.97	2.03973	0.44
204	serum	4.74	4.65	3.6
119	serum	8.08	7.96	7.16
46	serum	8.08	8.03	6.15
86	serum	3.78	3.82	1.7
62	serum	7.77	7.67	6.48
259	red blood cells	4.14	4.26	3.05
162	red blood cells	1.91	1.89	1.37
204	red blood cells	4.04	4.02	3.23
119	red blood cells	7.44	7.44	7.1
46	red blood cells	6.9	6.97	5.57
86	red blood cells	3.12	2.87	1.97
62	red blood cells	7.42	7.52	6.93
109EA	serum	5.63251	5.58314	5.7
EA	urine	5.39595	5.63985	5.43
